# Supplementary material for: Intake of Processed Meat and Association with Sociodemographic and Lifestyle Factors in a Representative Sample of the Swiss Population
Source: PubMed Central journal article supplement (PMC6893731; doi:10.3390/nu11112556), 2019-10-23
Supplement: nutrients-11-02556-s001.pdf [file nutrients-11-02556-s001.pdf]

## Supplementary Materials:

Intake of processed meat and associations with sociodemographic and lifestyle factors in a representative sample of the Swiss population.

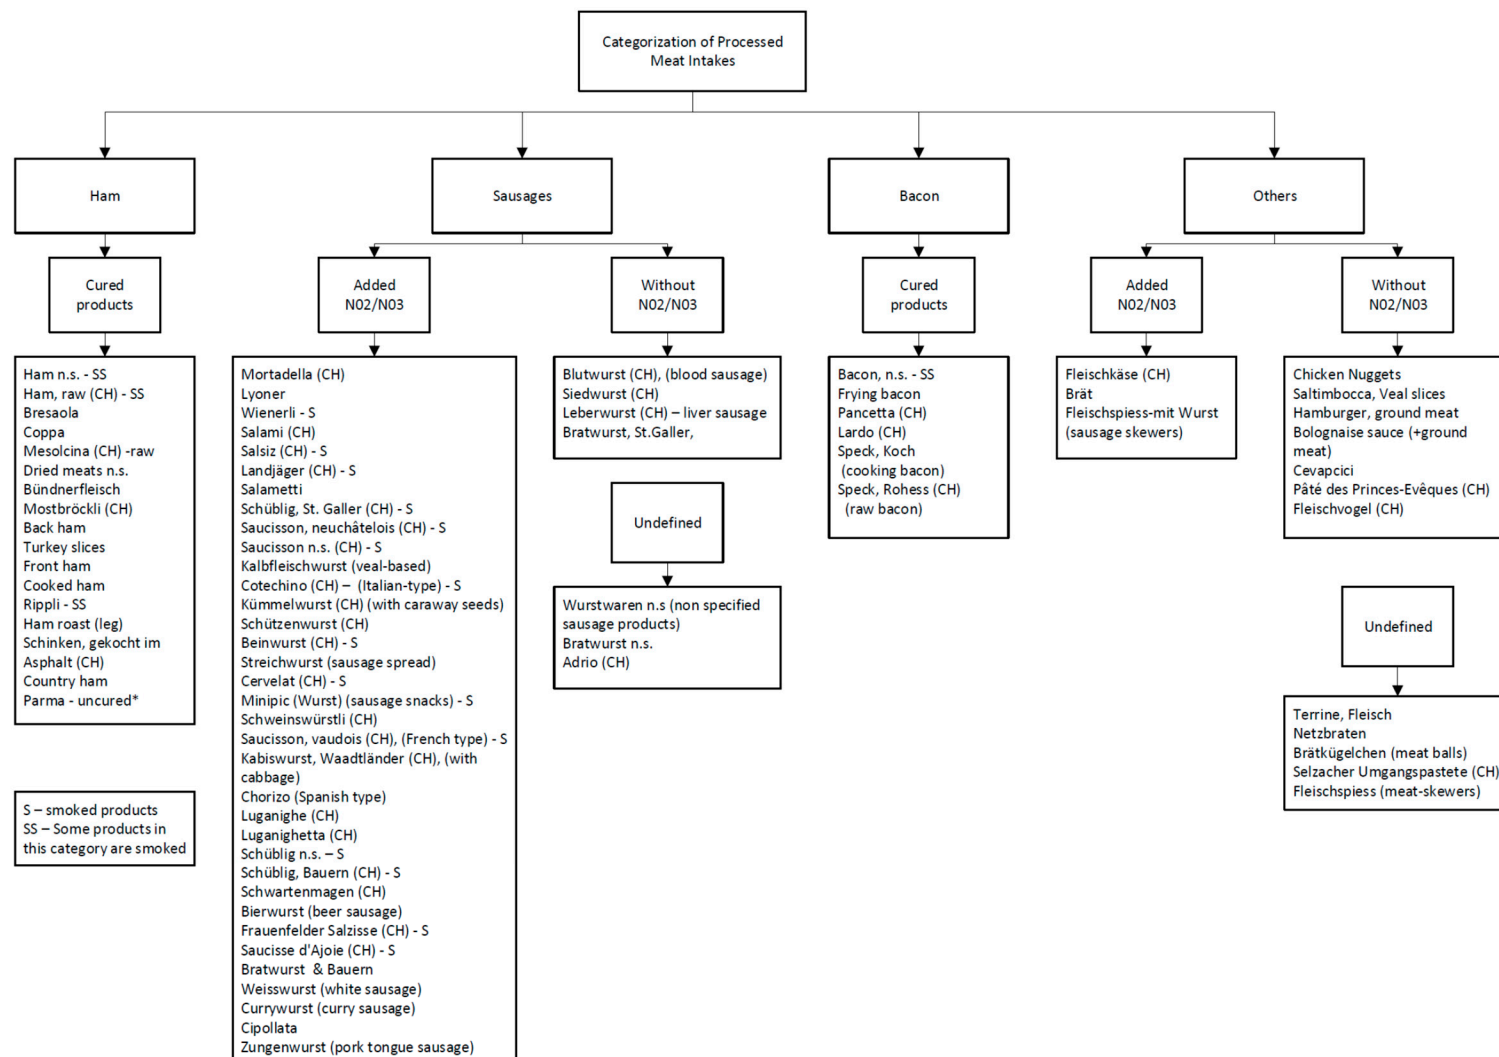

**Figure S1.** Categorization of processed meat consumptions, National Nutrition Survey menuCH, N=2,057.

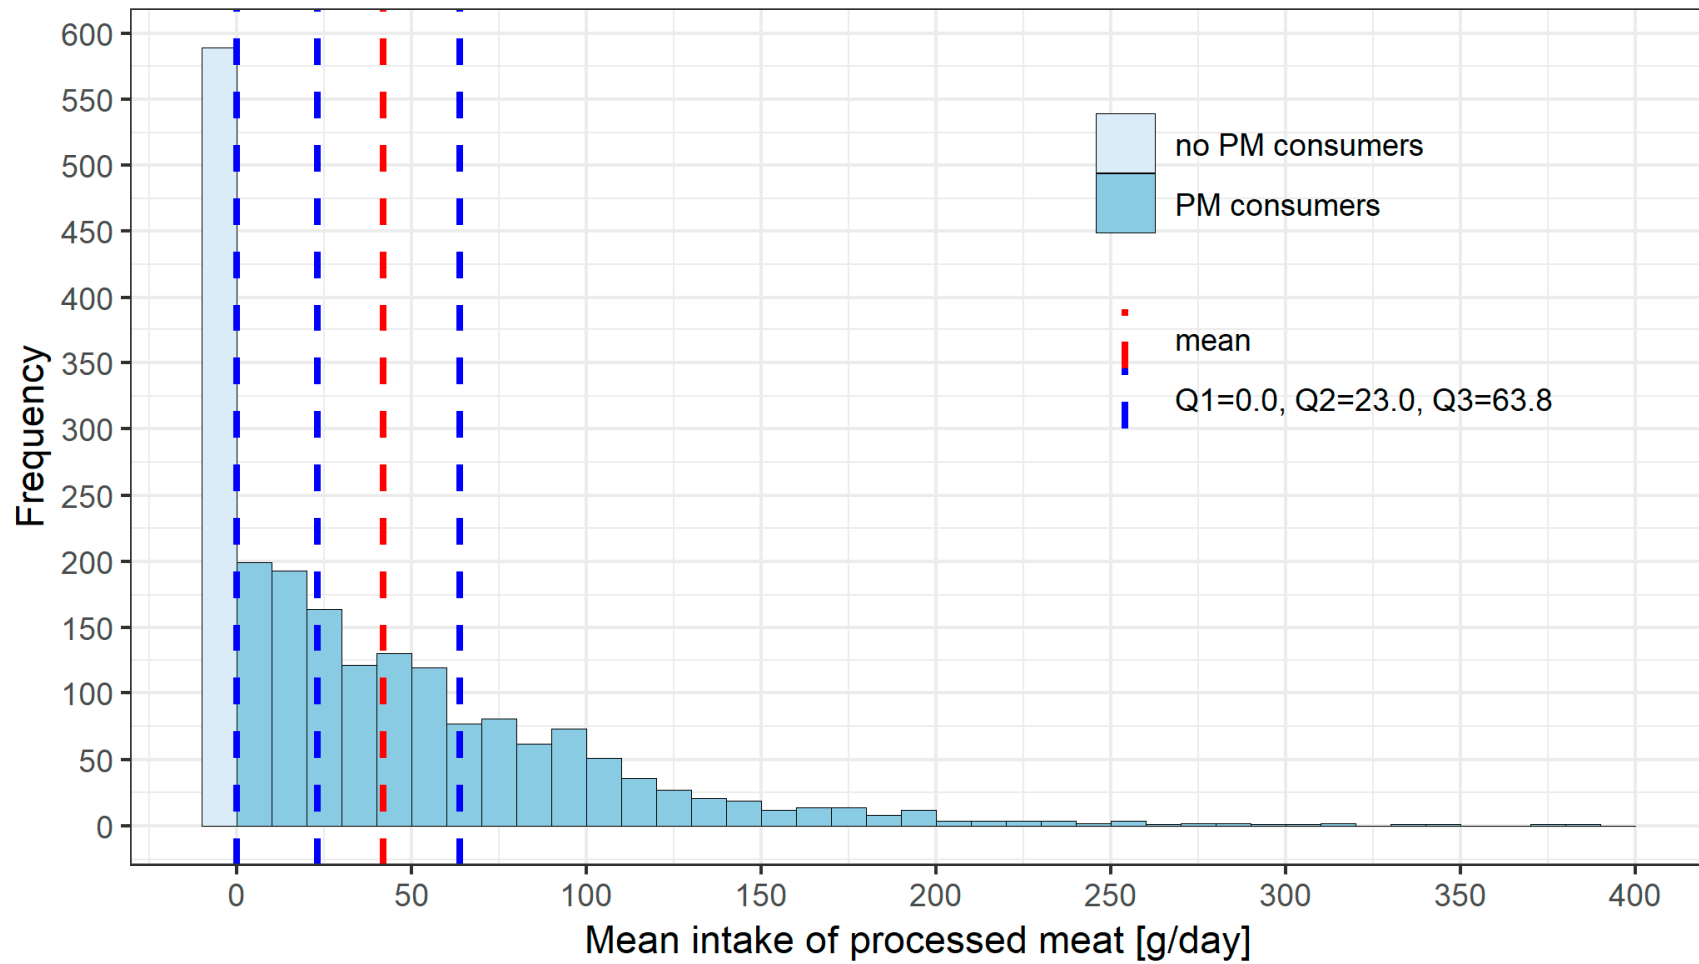

**Figure S2.** Histogram of processed meat (PM) intakes by the population, National Nutrition Survey menuCH  $N = 2,057$  crude data.
